# Supplementary material for: Introducing gradient Er ions and oxygen defects into SrCoO3 for regulating structural, electrical and magnetic transport properties
Source: Royal Society of Chemistry journal article supplement (doi:10.1039/d3dt03583b), 2024-01-01
Supplement: d3dt03583b1.pdf [file d3dt03583b1.pdf]

# Introducing gradient Er ions and oxygen defects into SrCoO<sub>3</sub> for regulating structure, electrical and magnetic transport properties

Hongyuan Song, Xuesong Wang, Haorong Wu, Kun Dong, Kun Meng, Ju Rong, Xiaohua Yu, Liangwei Chen, Bin Liu, Zhenhua Ge, Lan Yu\*

Faculty of Materials Science and Engineering, Kunming University of Science and Technology, Kunming, 650093, PR China

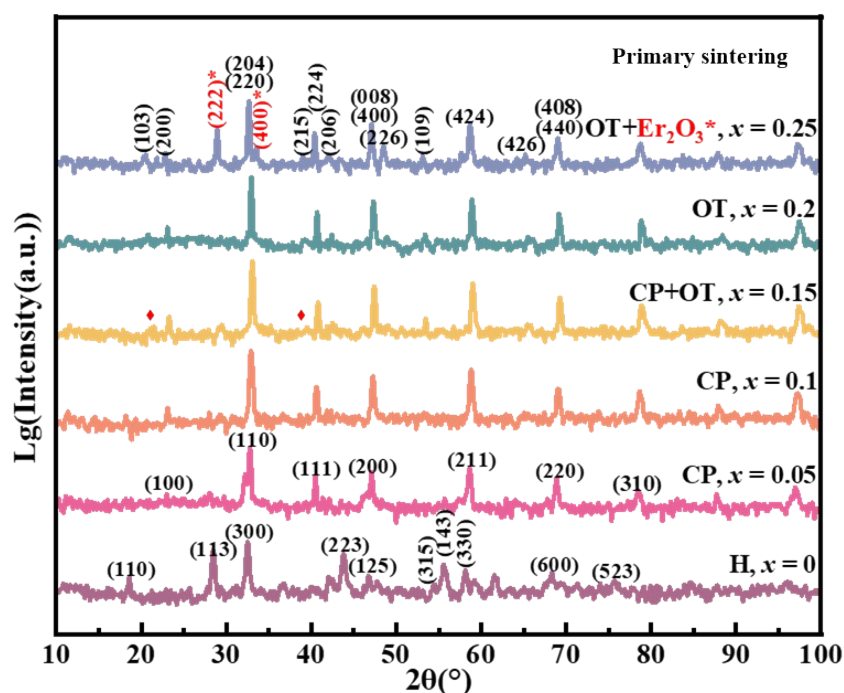

Fig.1. (a) XRD patterns of primary sintering Sr<sub>1-x</sub>Er<sub>x</sub>CoO<sub>3-δ</sub> (x = 0~0.25) polycrystals.

Table 1. Phase structures, lattice constants, space groups and densities of Sr<sub>1-x</sub>Er<sub>x</sub>CoO<sub>3-δ</sub> (x = 0~0.25) polycrystals.

| Samples  | Phase structure | Lattice constant |           | Space group            | Density P /g·cm <sup>-3</sup> |
|----------|-----------------|------------------|-----------|------------------------|-------------------------------|
|          |                 | a /Å             | c /Å      |                        |                               |
| x = 0    | H               | 9.5035           | 12.3966   | R32                    | 4.608                         |
| x = 0.05 | CP              | 3.8508           | —         | Pm $\bar{3}$ m         | 4.793                         |
| x = 0.1  | CP              | 3.8459           | —         | Pm $\bar{3}$ m         | 4.903                         |
| x = 0.15 | CP+T            | 3.8382/7.6241    | —/15.3711 | Pm $\bar{3}$ m/+I4/mmm | 4.887                         |
| x = 0.2  | OT              | 7.6155           | 15.3501   | I4/mmm                 | 4.762                         |
| x = 0.25 | OT              | 7.6246           | 15.3241   | I4/mmm                 | 5.002                         |

Table 2. Atomic parameters following the conclusion of the Rietveld refinement in H, CP and OT.

| Samples         | Phase          | Atoms           | Site | $x$     | $y$     | $z$     | Occ   |
|-----------------|----------------|-----------------|------|---------|---------|---------|-------|
| $x = 0$<br>H    |                | Sr <sub>1</sub> | 9d   | 0.3206  | 0       | 0       | 1     |
|                 |                | Sr <sub>2</sub> | 9e   | 0.6447  | 0       | 0.5     | 1     |
|                 |                | Co <sub>1</sub> | 3b   | 0       | 0       | 0.5     | 1     |
|                 |                | Co <sub>2</sub> | 6c   | 0       | 0       | 0.095   | 1     |
|                 |                | Co <sub>3</sub> | 6c   | 0       | 0       | 0.299   | 1     |
|                 |                | O <sub>1</sub>  | 9d   | 0.8466  | 0       | 0       | 1     |
|                 |                | O <sub>2</sub>  | 18f  | 0.4959  | 0.6746  | 0.4789  | 1     |
|                 |                | O <sub>3</sub>  | 18f  | 0.8419  | -0.0229 | 0.6116  | 1     |
| $x = 0.1$<br>CP |                | Sr              | 1a   | 0       | 0       | 0       | 0.9   |
|                 |                | Co              | 1b   | 0.5     | 0.5     | 0.5     | 1     |
|                 |                | O               | 3c   | 0.5     | 0.5     | 0       | 0.88  |
|                 |                | Er              | 1a   | 0       | 0       | 0       | 0.1   |
| 0.2<br>OT       |                | Er              | 4e   | 0       | 0       | 0.13608 | 0.833 |
|                 |                | Sr <sub>1</sub> | 4e   | 0       | 0       | 0.62844 | 1     |
|                 |                | Sr <sub>2</sub> | 8g   | 0       | 0.5     | 0.12942 | 1     |
|                 |                | Co <sub>1</sub> | 8h   | 0.24221 | 0.24221 | 0       | 1     |
|                 |                | Co <sub>2</sub> | 8f   | 0.25    | 0.25    | 0.25    | 1     |
|                 |                | O <sub>1</sub>  | 16m  | 0.24068 | 0.24068 | 0.10956 | 1     |
|                 |                | O <sub>2</sub>  | 8i   | 0.51830 | 0       | 0       | 0.232 |
|                 |                | O <sub>3</sub>  | 8i   | 0.33085 | 0       | 0       | 0.148 |
|                 |                | O <sub>4</sub>  | 8j   | 0.23815 | 0.5     | 0       | 1     |
|                 | O <sub>5</sub> | 16n             | 0    | 0.24904 | 0.25853 | 1       |       |

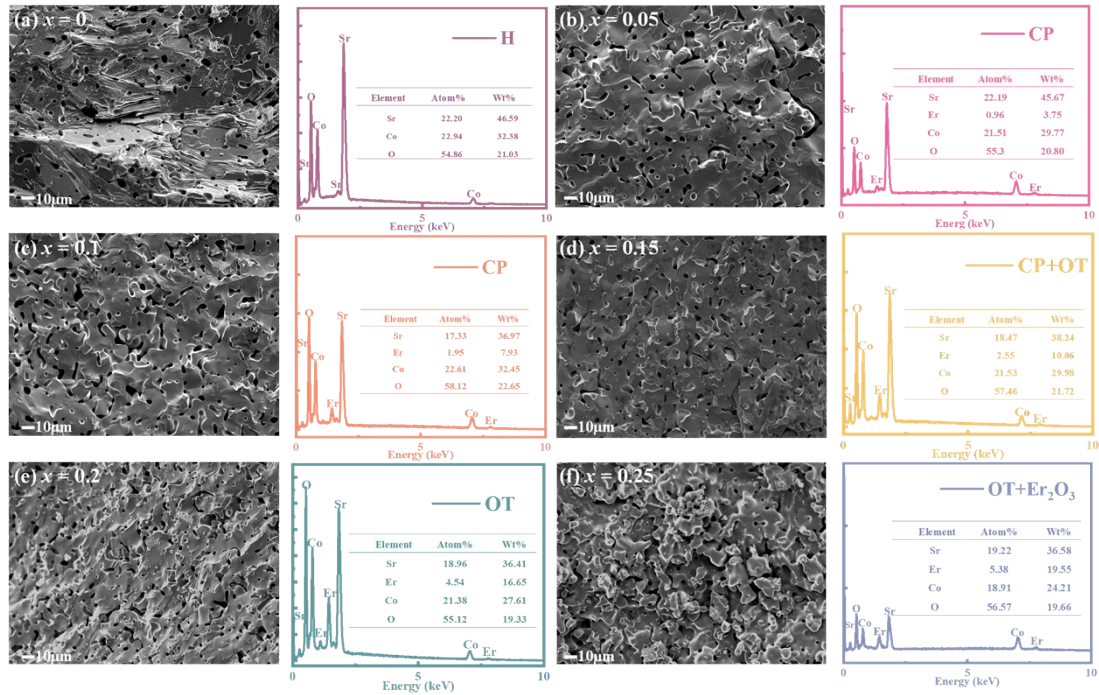

Figure 2. Cross-section micromorphology and EDS of  $\text{Sr}_{1-x}\text{Er}_x\text{CoO}_{3-\delta}$  ( $x = 0\sim 0.25$ ) polycrystals.

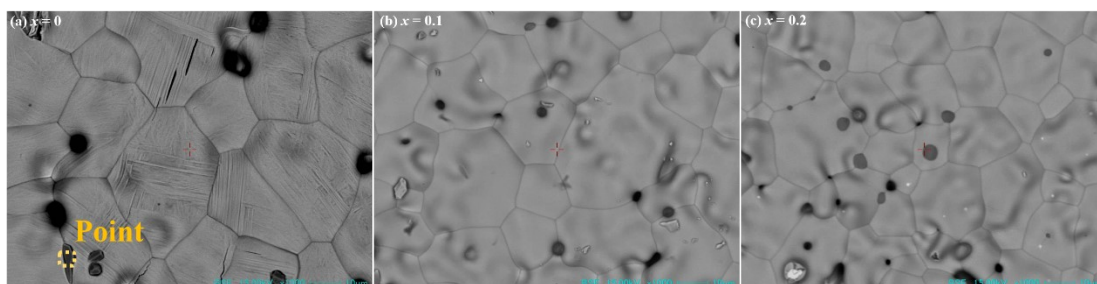

Figure 3. Surface micromorphology images of  $\text{Sr}_{1-x}\text{Er}_x\text{CoO}_{3-\delta}$  ( $x = 0, 0.15, 0.2$ ) polycrystals.

Table 3. Surface elements analysis of  $\text{Sr}_{1-x}\text{Er}_x\text{CoO}_{3-\delta}$  ( $x = 0, 0.15, 0.2$ ) polycrystals.

| Samples                                                             | Elements | Line         | Mass/% | Normalized Mass/% | Mol/%  |
|---------------------------------------------------------------------|----------|--------------|--------|-------------------|--------|
| $x = 0$<br>( $\text{Sr}_6\text{Co}_5\text{O}_{15}$ )                | O        | $\text{K}_a$ | 20.899 | 20.9              | 55.151 |
|                                                                     | Co       | $\text{K}_a$ | 28.710 | 28.709            | 20.568 |
|                                                                     | Sr       | $\text{L}_a$ | 50.391 | 50.391            | 24.281 |
| $x = 0.1$<br>( $\text{Sr}_{0.9}\text{Er}_{0.1}\text{CoO}_{2.689}$ ) | O        | $\text{K}_a$ | 22.053 | 22.031            | 57.73  |
|                                                                     | Co       | $\text{K}_a$ | 28.725 | 28.698            | 20.414 |
|                                                                     | Sr       | $\text{L}_a$ | 41.768 | 41.728            | 19.965 |
| $x = 0.2$<br>( $\text{Sr}_{0.8}\text{Er}_{0.2}\text{CoO}_{2.635}$ ) | Er       | $\text{L}_b$ | 7.55   | 7.543             | 1.891  |
|                                                                     | O        | $\text{K}_a$ | 20.606 | 20.614            | 56.598 |
|                                                                     | Co       | $\text{K}_a$ | 28.984 | 28.996            | 21.612 |
| $x = 0$<br>(Point, $\text{Co}_3\text{O}_4$ )                        | Sr       | $\text{L}_a$ | 35.831 | 35.845            | 17.97  |
|                                                                     | Er       | $\text{L}_b$ | 14.538 | 14.544            | 3.82   |
|                                                                     | O        | $\text{K}_a$ | 32.328 | 31.625            | 63.135 |
| $x = 0$<br>(Point, $\text{Co}_3\text{O}_4$ )                        | Co       | $\text{K}_a$ | 68.787 | 67.292            | 36.47  |
|                                                                     | Sr       | $\text{L}_a$ | 1.107  | 1.083             | 0.395  |

Table 4 ICP results of  $\text{Sr}_{1-x}\text{Er}_x\text{CoO}_{3-\delta}$  ( $x = 0, 0.1, 0.2$ ) polycrystals.

| Sample                                                  | Sr     | Er     | Co     | Sr      | Er      | Co      |
|---------------------------------------------------------|--------|--------|--------|---------|---------|---------|
|                                                         | (mg/L) | (mg/L) | (mg/L) | (mol/L) | (mol/L) | (mol/L) |
| $\text{SrCoO}_{2.626}$ (H)                              | 1208   | 0      | 834    | 0.01415 | 0       | 0.01379 |
| $\text{Sr}_{0.9}\text{Er}_{0.1}\text{CoO}_{2.689}$ (CP) | 985    | 217    | 782    | 0.01124 | 0.00130 | 0.01327 |
| $\text{Sr}_{0.8}\text{Er}_{0.2}\text{CoO}_{2.635}$ (OT) | 852    | 413    | 747    | 0.00972 | 0.00250 | 0.01268 |

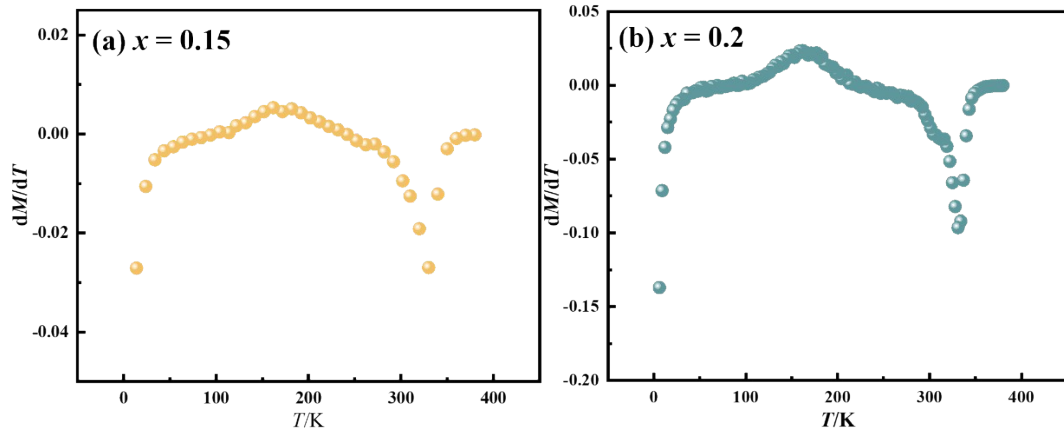

Figure 4.  $dM/dT$  curves of  $Sr_{1-x}Er_xCoO_{3-\delta}$  ( $x = 0.15, 0.2$ ) polycrystals.

Table 5. Effective and saturation magnetic moments of HS, IS, and LS in  $Co^{3+}$  and  $Co^{4+}$  ions.

| Magnetic moments           | $Co^{3+}$ |      |      | $Co^{4+}$ |      |      |
|----------------------------|-----------|------|------|-----------|------|------|
|                            | LS        | IS   | HS   | LS        | IS   | HS   |
| $\mu_{eff}$<br>( $\mu_B$ ) | 0         | 2.83 | 4.90 | 1.73      | 3.87 | 5.92 |
| $\mu_s$<br>( $\mu_B$ )     | 0         | 2    | 4    | 1         | 3    | 5    |
